# Supplementary material for: Parent-of-Origin Effects of the APOB Gene on Adiposity in Young Adults
Source: PLoS Genet. 2015 Oct 9;11(10):e1005573. doi: 10.1371/journal.pgen.1005573 (PMC4599806; doi:10.1371/journal.pgen.1005573)
Supplement: S9 Table — (XLSX) [file pgen.1005573.s010.xlsx]

## Sheet: Sup9 meta for APOB region
Table S9. Meta-analysis results of parent-of-origin effects on BMI of 42 SNPs spanning the APOB locus in FHS, FamHS and ERF (JPS not included)
						Maternal Effect														Paternal Effect
SNP info						ERF info		FamHS info		FHS info		W				Z				ERF info		FamHS info		FHS info		W				Z
MarkerName	Chr	position (GRCh37/hg19)	Allele1	Allele2	Freq1	beta (abetam)	p-value (aP_om)	beta (abetam)	p-value (aP_om)	beta (abetam)	p-value (aP_om)	Effect	StdErr	P-value	Direction	Weight	Zscore	P-value	Direction	beta (abetap)	p-value (aP_op)	beta (abetap)	p-value (aP_op)	beta (abetap)	p-value (aP_op)	Effect	StdErr	P-value	Direction	Weight	Zscore	P-value	Direction	F P-value ERF	F P-value FamHS	F P-value FHS	F value total	F P-value total
rs4341893	2	21135577	a	g	0.3277	0.342	0.527246	0.165	0.684846	-0.374	0.129402	-0.1537	0.1965	0.4341	++-	3758	-0.743	0.4574	++-	0.172	0.713966	-0.493	0.234059	0.12	0.623651	-0.0031	0.1921	0.987	+-+	3758	-0.019	0.985	+-+	0.805463	0.260524	0.150817	6.90617	0.329612
rs4362515	2	21135628	t	c	0.2368	-0.864	0.0773486	-0.657	0.237781	0.471	0.080284	0.036	0.2172	0.8684	--+	4252	0.187	0.8516	--+	0.208	0.649467	-0.316	0.496534	-0.57	0.0247633	-0.3737	0.2003	0.0621	+--	4252	-1.942	0.0521	+--	0.0962309	0.628251	0.00343763	16.9576	0.00944038
rs4368289	2	21135723	t	g	0.8108	-0.397	0.433487	-1.205	0.0275362	0.285	0.327026	-0.1157	0.229	0.6135	--+	4572	-0.547	0.5842	--+	0.516	0.283346	-0.83	0.0933074	0.407	0.137696	0.1958	0.2146	0.3616	+-+	4572	0.835	0.4037	+-+	0.17392	0.610213	0.755101	5.04802	0.537669
rs13414987	2	21141832	a	c	0.2587	-0.687	0.130527	-0.773	0.15309	0.712	0.00767906	0.1801	0.2119	0.3952	--+	4120	0.894	0.3711	--+	0.328	0.471278	0.064	0.884494	-0.296	0.236932	-0.1085	0.1963	0.5807	++-	4120	-0.606	0.5442	++-	0.117791	0.217881	0.00440965	18.1732	0.00581357
rs4274565	2	21141909	a	c	0.5354	-0.626	0.175835	0.209	0.614594	-0.131	0.5537	-0.142	0.1798	0.4297	-+-	3403	-0.747	0.4553	-+-	0.407	0.375994	-0.466	0.255655	0.169	0.446374	0.0834	0.1797	0.6425	+-+	3403	0.413	0.6798	+-+	0.114652	0.260925	0.337178	9.19303	0.16301
rs4507059	2	21143329	a	g	0.6709	0.157	0.742106	-0.109	0.80666	0.161	0.518358	0.107	0.1979	0.5888	+-+	3702	0.525	0.5995	+-+	0.26	0.583461	0.04	0.927824	0.091	0.714223	0.11	0.197	0.5765	+++	3702	0.543	0.5872	+++	0.870996	0.813272	0.842004	1.03356	0.984308
rs3923037	2	21148274	a	c	0.6429	0.543	0.193503	0.978	0.0243821	-0.231	0.332968	0.1482	0.187	0.4282	++-	3775	0.841	0.4006	++-	-0.218	0.599536	-0.274	0.492346	-0.071	0.764941	-0.1424	0.1831	0.437	---	3775	-0.772	0.44	---	0.20449	0.0366339	0.624786	10.7287	0.0971312
rs2337382	2	21184764	a	g	0.4328	0.846	0.0368197	0.506	0.215249	-0.192	0.372678	0.1203	0.1724	0.4852	++-	3733	0.678	0.4979	++-	-0.384	0.338282	-0.039	0.922318	0.123	0.568941	0.0002	0.1717	0.9991	--+	3733	0.032	0.9745	--+	0.0211319	0.346507	0.300087	12.241	0.0568031
rs938848	2	21196847	c	g	0.7384	-0.849	0.101023	0.226	0.60874	-0.037	0.880693	-0.1034	0.1987	0.603	-+-	4231	-0.539	0.5896	-+-	-0.428	0.372314	0.585	0.180876	-0.306	0.215057	-0.1471	0.1961	0.4534	-+-	4231	-0.727	0.4674	-+-	0.521776	0.559904	0.434416	4.12852	0.659289
rs11685356	2	21197159	t	c	0.262	-0.847	0.0637899	-0.499	0.310425	0.295	0.24321	-0.0611	0.2017	0.7619	--+	4206	-0.22	0.826	--+	0.328	0.446648	0.166	0.721228	-0.582	0.017901	-0.2674	0.1941	0.1683	++-	4206	-1.458	0.1448	++-	0.0525805	0.318623	0.0104679	17.2972	0.00825088
rs10164442	2	21205563	a	g	0.6587	0.701	0.0897769	-0.001	1	-0.218	0.342385	-0.0012	0.2007	0.9953	+?-	3943	-0.094	0.9249	+0-	-0.395	0.330332	-0.007	0.976327	0.547	0.0157205	0.187	0.1515	0.2173	--+	3943	1.524	0.1274	--+	0.0513656	0.976327	0.0145799	14.4417	0.0250729
rs7557067	2	21208211	a	g	0.7792	0.392	0.47935	1.075	0.02986	-0.14	0.597811	0.1707	0.2155	0.4282	++-	4420	0.859	0.3902	++-	0.093	0.856109	-0.07	0.882297	-0.065	0.807737	-0.0391	0.2118	0.8537	+--	4420	-0.19	0.8494	+--	0.677325	0.0874094	0.838668	6.00539	0.422586
rs13014683	2	21213126	t	c	0.1918	0.736	0.157704	1.09	0.0392426	0.256	0.384098	0.5085	0.2305	0.02738	+++	4510	2.204	0.02752	+++	-0.533	0.270856	0.609	0.213427	0.137	0.629563	0.0943	0.2191	0.6668	-++	4510	0.52	0.6032	-++	0.0628788	0.500005	0.764834	7.45556	0.280762
rs693	2	21232195	a	g	0.4974	-0.174	0.677733	0.153	0.700049	0.315	0.145314	0.2008	0.173	0.2457	-++	3715	1.193	0.2329	-++	0.343	0.415501	-0.144	0.717534	-0.021	0.919792	0.0155	0.1692	0.927	+--	3715	0.059	0.9529	+--	0.38392	0.60623	0.294847	5.35823	0.498754
rs10199768	2	21244000	t	g	0.4387	-0.366	0.364466	0.607	0.138343	0.336	0.150734	0.2473	0.1814	0.1727	-++	3492	1.467	0.1423	-++	0.324	0.423989	-0.231	0.568603	-0.085	0.711959	-0.0334	0.1795	0.8522	+--	3492	-0.241	0.8099	+--	0.215081	0.151623	0.207112	9.99519	0.124855
rs3791980	2	21245329	t	g	0.7309	0.056	0.913611	1.412	0.00285266	-0.154	0.59429	0.2315	0.2226	0.2985	++-	3799	1.052	0.2929	++-	-0.117	0.795855	-0.312	0.491877	-0.191	0.499378	-0.2011	0.212	0.3428	---	3799	-0.956	0.3388	---	0.789387	0.00760362	0.92253	10.3925	0.109066
rs679899	2	21250914	a	g	0.4628	0.401	0.336618	-0.475	0.243566	-0.026	0.909263	-0.0342	0.1797	0.849	+--	3773	-0.233	0.816	+--	-0.725	0.0766655	0.474	0.24189	0.075	0.729583	0.0048	0.1733	0.9779	-++	3773	0.106	0.9156	-++	0.0524685	0.105216	0.744157	10.9896	0.0886993
rs1469513	2	21259562	t	c	0.575	0.178	0.661733	-0.428	0.31292	-0.342	0.113934	-0.2612	0.1742	0.1337	+--	3751	-1.555	0.12	+--	-0.246	0.546074	0.355	0.395203	0.064	0.764245	0.0581	0.1722	0.7357	-++	3751	0.377	0.7063	-++	0.445933	0.194255	0.183804	8.28011	0.218291
rs520354	2	21259612	a	g	0.5375	-0.408	0.328162	0.512	0.218883	0.031	0.878267	0.038	0.1668	0.8197	-++	3750	0.276	0.7829	-++	0.741	0.0711097	-0.582	0.160175	-0.067	0.756139	-0.013	0.1734	0.9401	+--	3750	-0.155	0.8765	+--	0.0480096	0.0697418	0.746771	11.9826	0.0623579
rs512535	2	21267782	t	c	0.4898	0.068	0.862473	0.901	0.0312987	0.296	0.190779	0.3583	0.1775	0.04357	+++	3541	2.1	0.03574	+++	-0.261	0.507591	-0.354	0.397792	-0.074	0.745311	-0.1632	0.1784	0.3603	---	3541	-0.901	0.3677	---	0.545506	0.0329962	0.247433	10.828	0.0938387
rs588245	2	21270057	a	g	0.4934	0.2	0.616475	0.774	0.0629226	0.188	0.397898	0.2952	0.176	0.0936	+++	3603	1.72	0.08537	+++	-0.269	0.497967	-0.243	0.559719	-0.1	0.655569	-0.1593	0.1768	0.3676	---	3603	-0.881	0.3781	---	0.402518	0.0844785	0.361541	8.7973	0.185303
rs1713223	2	21271270	a	c	0.4925	-0.207	0.605304	-0.898	0.033829	0.131	0.548505	-0.1085	0.1746	0.5345	--+	3709	-0.645	0.5192	--+	0.219	0.583646	0.355	0.400243	-0.148	0.49475	0.0065	0.1737	0.9702	++-	3709	0.019	0.9847	++-	0.445085	0.0360332	0.363398	10.2901	0.112954
rs7575840	2	21273490	t	g	0.3249	0.46	0.292321	0.912	0.027669	0.331	0.148342	0.4658	0.1822	0.01055	+++	4050	2.543	0.01101	+++	0.336	0.427142	-0.211	0.618701	-0.493	0.0275303	-0.2939	0.1792	0.101	+--	4050	-1.701	0.08886	+--	0.834809	0.0541047	0.00942982	15.5225	0.0165596
rs12468735	2	21275825	a	g	0.47	-0.081	0.848507	-0.793	0.0602662	-0.078	0.712113	-0.1981	0.1726	0.2511	---	3718	-1.217	0.2237	---	-0.102	0.809973	0.191	0.647685	0.319	0.136098	0.2262	0.1738	0.193	-++	3718	1.317	0.1877	-++	0.973269	0.0959255	0.186631	8.0998	0.230883
rs11892073	2	21276401	a	g	0.47	-0.081	0.848507	-0.801	0.0570747	-0.048	0.819576	-0.1792	0.172	0.2976	---	3752	-1.111	0.2665	---	-0.102	0.809973	0.199	0.633164	0.277	0.191864	0.2007	0.1728	0.2452	-++	3752	1.179	0.2386	-++	0.973269	0.0898395	0.276159	7.44721	0.28146
rs6548010	2	21277922	a	g	0.6775	-0.375	0.395115	-1.039	0.00981198	-0.263	0.258368	-0.4433	0.1832	0.01555	---	4044	-2.403	0.01628	---	-0.488	0.249324	0.207	0.612882	0.401	0.0776972	0.2032	0.1799	0.2587	-++	4044	1.201	0.2297	-++	0.849604	0.0279672	0.0400816	13.9131	0.0306222
rs1367115	2	21282015	t	c	0.3246	0.332	0.449271	0.939	0.017022	0.26	0.260206	0.4165	0.1814	0.02164	+++	4069	2.278	0.02271	+++	0.352	0.40893	-0.265	0.509965	-0.442	0.0497888	-0.2679	0.1785	0.1334	+--	4069	-1.563	0.118	+--	0.972093	0.0302929	0.0284242	14.1713	0.0277799
rs594677	2	21293006	t	c	0.4737	-0.186	0.649181	-0.823	0.0424216	-0.063	0.76902	-0.2215	0.172	0.1978	---	3717	-1.353	0.1761	---	-0.313	0.440595	0.027	0.94918	0.256	0.246605	0.1088	0.1764	0.5376	-++	3717	0.646	0.5182	-++	0.826348	0.13747	0.321487	6.61978	0.357444
rs1367113	2	21295832	a	g	0.3377	0.395	0.356418	0.763	0.0524133	0.065	0.772563	0.2641	0.1777	0.1371	+++	4020	1.466	0.1425	+++	0.503	0.243064	-0.359	0.367918	-0.469	0.0349848	-0.2831	0.1771	0.1099	+--	4020	-1.684	0.09209	+--	0.854536	0.0427279	0.0918599	11.3952	0.0769042
rs11673790	2	21299195	t	c	0.3044	0.714	0.134088	0.5	0.206247	0.06	0.788424	0.2448	0.1802	0.1743	+++	4238	1.37	0.1706	+++	1.121	0.0134169	-0.512	0.203731	-0.43	0.0532344	-0.2046	0.1789	0.2528	+--	4238	-1.167	0.2432	+--	0.526359	0.0693189	0.124622	10.7866	0.0952014
rs1429974	2	21300770	a	c	0.3116	0.655	0.157667	0.524	0.1844	-0.053	0.815974	0.1775	0.1815	0.328	++-	4210	0.969	0.3326	++-	1.088	0.0146505	-0.358	0.37091	-0.406	0.0667308	-0.1591	0.1777	0.3705	+--	4210	-0.921	0.3569	+--	0.492022	0.114539	0.266622	8.39599	0.210503
rs7567217	2	21303470	t	c	0.8332	-0.198	0.757595	-0.06	0.911474	0.243	0.418434	0.1184	0.2429	0.6259	--+	4567	0.457	0.648	--+	1.043	0.0710822	-0.685	0.22119	0.061	0.827257	0.0906	0.2295	0.6931	+-+	4567	0.326	0.7442	+-+	0.138606	0.414364	0.655202	6.55989	0.36347
rs568938	2	21303616	t	c	0.7779	0.21	0.621159	-0.862	0.076816	-0.156	0.562491	-0.1963	0.2061	0.341	+--	4284	-1.095	0.2736	+--	0.758	0.0830593	-0.502	0.316972	0.132	0.620462	0.1644	0.2073	0.4278	+-+	4284	0.606	0.5443	+-+	0.367	0.599057	0.443879	4.65399	0.588893
rs754524	2	21311541	t	g	0.7469	-1.021	0.0400629	-0.628	0.136395	-0.266	0.31456	-0.4784	0.2043	0.0192	---	4247	-2.303	0.02131	---	-0.609	0.17777	0.523	0.21613	0.047	0.854102	0.0257	0.1969	0.8962	-++	4247	0.179	0.8581	-++	0.522235	0.0452113	0.38487	9.40179	0.152211
rs754523	2	21311691	a	g	0.6847	-0.655	0.157667	-0.485	0.218258	-0.004	1	-0.5563	0.3002	0.06386	--?	4202	-1.113	0.2659	--0	-1.088	0.0146505	0.358	0.371447	0.459	0.038288	0.193	0.1778	0.2777	-++	4202	1.11	0.2669	-++	0.492022	0.130955	0.145121	9.34464	0.155103
rs2337383	2	21320516	a	g	0.6939	-0.629	0.1811	-0.552	0.165902	-0.053	0.816872	-0.2452	0.1828	0.18	---	4162	-1.337	0.1812	---	-1.136	0.0114029	0.605	0.137567	0.451	0.044249	0.2261	0.1799	0.2089	-++	4162	1.293	0.1959	-++	0.429416	0.0396428	0.118046	12.4197	0.0532344
rs312942	2	21321866	t	c	0.3571	-0.649	0.139402	-1.211	0.00509509	0.1	0.657839	-0.2614	0.1821	0.1511	--+	3931	-1.546	0.122	--+	-0.277	0.496956	-0.209	0.605495	0.192	0.389631	0.0283	0.1762	0.8723	--+	3931	0.171	0.8645	--+	0.530299	0.0799162	0.768919	6.84772	0.33516
rs97458	2	21327635	a	g	0.6718	-0.463	0.269744	-0.754	0.0682676	0.233	0.316527	-0.0911	0.1825	0.6178	--+	3913	-0.485	0.6276	--+	0.227	0.59389	-0.808	0.0639043	-0.034	0.884589	-0.1247	0.1857	0.5019	+--	3913	-0.768	0.4426	+--	0.247608	0.925798	0.420897	4.67675	0.585889
rs17395512	2	21346556	t	c	0.6902	-0.536	0.254317	-0.599	0.126845	-0.057	0.806303	-0.2496	0.184	0.175	---	4206	-1.331	0.1832	---	-1.207	0.00778509	0.607	0.128221	0.44	0.0469256	0.2194	0.1781	0.218	-++	4206	1.25	0.2111	-++	0.297919	0.0292197	0.119718	13.7329	0.032766
rs11687710	2	21371068	t	c	0.6926	-0.519	0.27157	-0.635	0.107904	-0.08	0.728184	-0.2657	0.1833	0.1472	---	4215	-1.429	0.1529	---	-1.197	0.00834807	0.585	0.145643	0.366	0.0995019	0.1668	0.1787	0.3507	-++	4215	0.96	0.3368	-++	0.288745	0.028065	0.163297	13.2553	0.0391569
rs11903224	2	21431361	c	g	0.2235	0.162	0.767905	-0.418	0.361665	-0.24	0.391458	-0.2167	0.2191	0.3228	+--	4427	-0.982	0.326	+--	1.098	0.0304077	-0.193	0.664107	-0.479	0.0668356	-0.1578	0.2059	0.4435	+--	4427	-0.792	0.4281	+--	0.200674	0.72392	0.515422	5.18383	0.520461
rs949790	2	21449987	a	g	0.2177	0.376	0.496507	-0.485	0.289707	-0.203	0.468858	-0.1765	0.2194	0.4211	+--	4458	-0.791	0.4289	+--	1.081	0.0333771	-0.139	0.753386	-0.482	0.0642827	-0.1529	0.2053	0.4566	+--	4458	-0.761	0.4468	+--	0.341631	0.586956	0.44837	4.81794	0.567367
JPS , Jerusalem Perinatal Study; FHS, Framingham Heart Study; FamHS, Family Heart Study; ERF, Erasmus Rucphen Family
